# Supplementary material
Source: PubMed Central journal article supplement (PMC4290798)
Supplement: Supp_Fig1.pdf [file Supp_Fig1.pdf]

## Supplementary Data

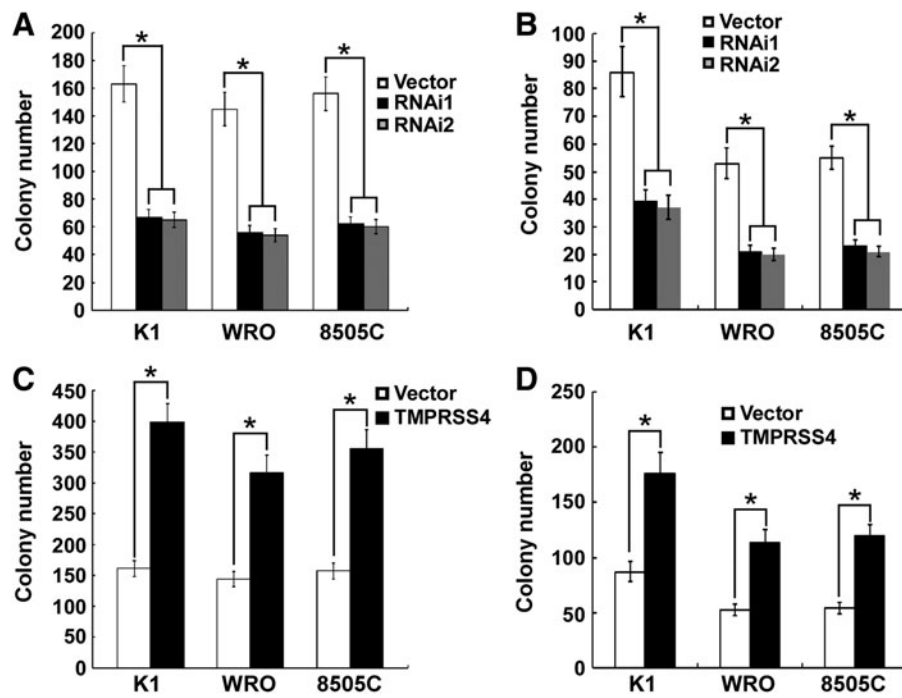

**SUPPLEMENTARY FIG. S1.** (A, C) Quantification of crystal violet-stained cell colonies of indicated cells. (B, D) Mean anchorage independent colony numbers formed by indicated cells. The data are reported as mean  $\pm$  SD of 3 independent experiments. \* $P < 0.05$ .
