# Supplementary material
Source: PubMed Central journal article supplement (PMC4290798)
Supplement: Supp_Fig2.pdf [file Supp_Fig2.pdf]

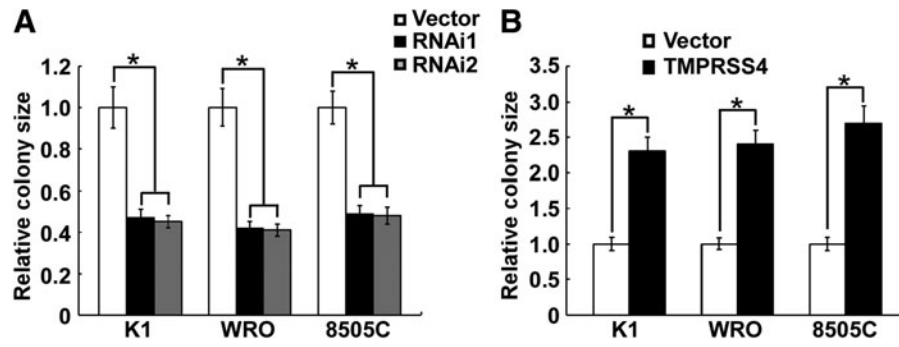

**SUPPLEMENTARY FIG. S2.** (A, B) Relative colony size of anchorage independent colonies formed by indicated cells. The data are reported as mean  $\pm$  SD of 3 independent experiments. \* $P < 0.05$ .
